# Supplementary material
Source: Springer Nature journal article supplement (https://www.springermedizin.de/resource/supplementary/13014_2013_966_MOESM1_ESM.pdf/9634522)
Supplement: MOESM1 [file 9634522]

Total 50 patients:

Screen patients for inclusion and exclusion criteria, obtain informed consent. Collect trial relevant data and patient history.

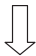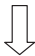

Experimental arm (n=25):  
WBHT  
Treatment planning  
&  
Application of treatment

Conventional arm (n=25):  
WBRT  
Treatment planning  
&  
Application of treatment

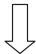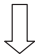

Clinical assessment, blood work after completion of radiation therapy

Clinical assessment, blood work and neuroimaging every 2 months after radiation therapy

Final study visit:  
12 months after  
study treatment

Regular follow-up visits every 2 months or in a shorter interval if clinically necessary
